# Supplementary material for: Enhancement in the reducibility of cobalt oxides on a mesoporous silica supported cobalt catalyst
Source: Royal Society of Chemistry journal article supplement (doi:10.1039/b417536k), 2005-01-01
Supplement: b417536k.pdf [file b417536k.pdf]

**Electronic supplementary information** for manuscript entitled  
“Enhancement in the reducibility of cobalt oxides on a mesoporous  
silica supported cobalt catalyst” written by D.J. Kim et al.

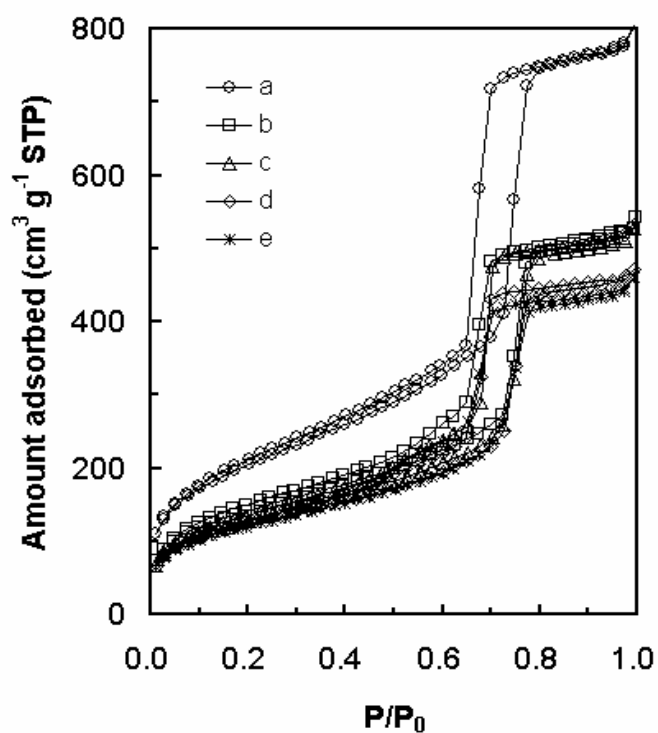

Fig. S1. Nitrogen adsorption isotherms for the cobalt/SBA-15 catalysts. (a) SBA-15, (b) 6CoSBA, (c) 6CoSBA-H1, (d) 6CoSBA-H2, (e) 6CoSBA-H3.
